# Supplementary figures and images for: The occurrence of through-bond orbital interactions in an α,ω donor–acceptor substituted bi(cyclohexylidene) and bi(cyclohexyl). X-Ray diffraction, UV–Vis absorption and photoelectron spectroscopy, ab initio SCF-MO and natural bond orbital analyses†
Source: Royal Society of Chemistry journal article supplement (doi:10.1039/b102410h), 2001-01-01

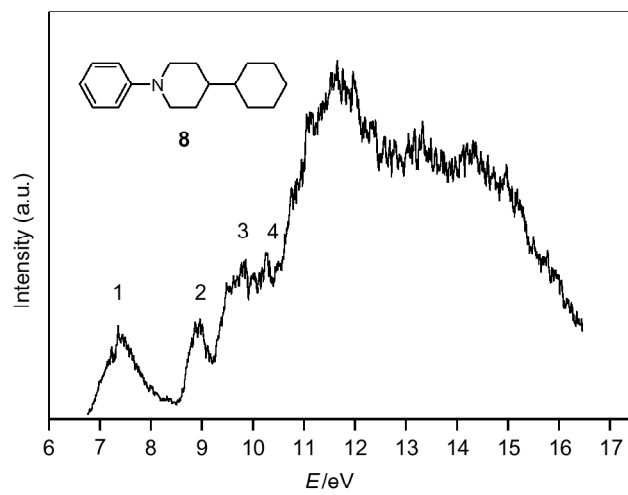

Figure 1S:

Supplement: b102410h_1s.pdf [file b102410h_1s.pdf]

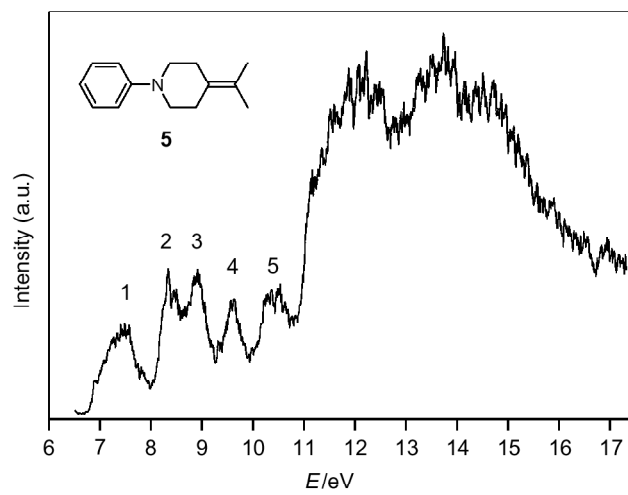

Figure 2S:

Supplement: b102410h_2s.pdf [file b102410h_2s.pdf]

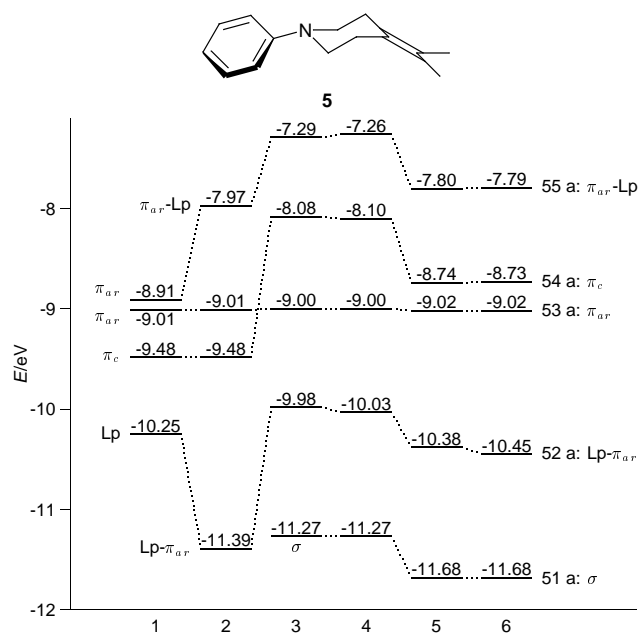

Figure 3S:

Supplement: b102410h_3s.pdf [file b102410h_3s.pdf]

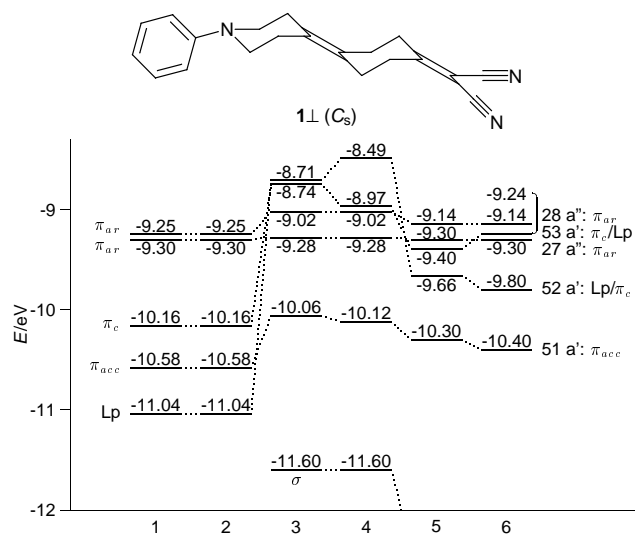

Figure 5S:

Supplement: b102410h_5s.pdf [file b102410h_5s.pdf]

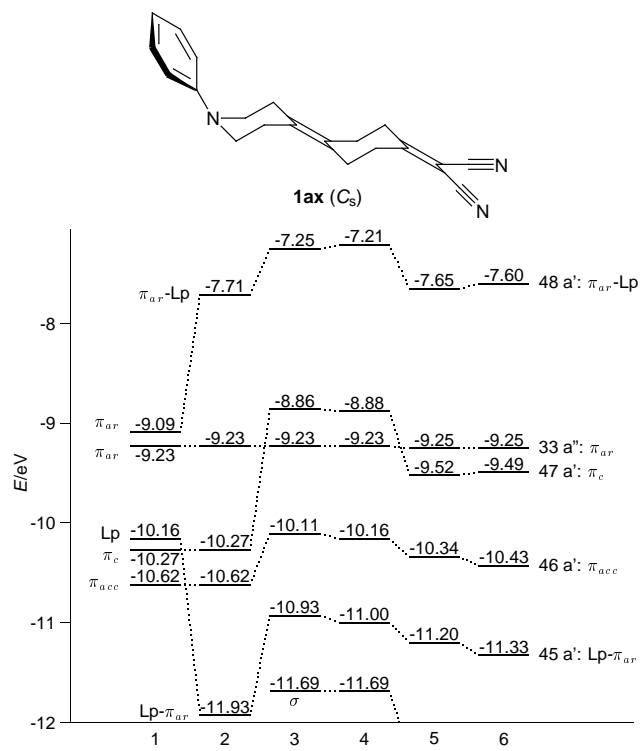

Figure 6S:

Supplement: b102410h_6s.pdf [file b102410h_6s.pdf]

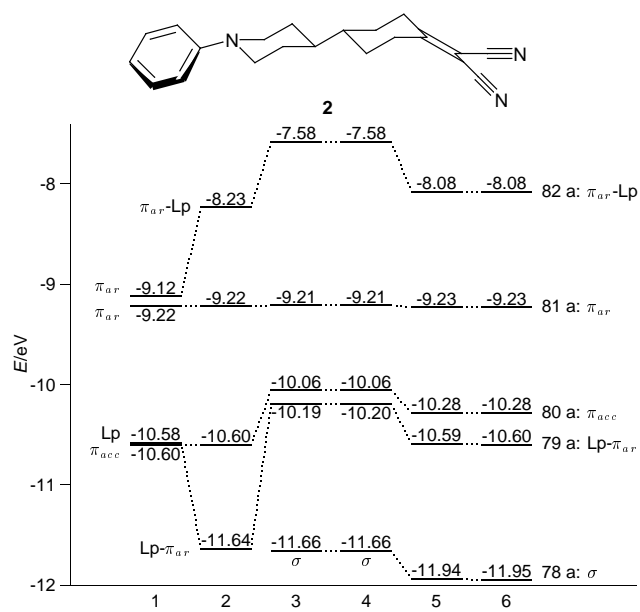

Figure 7S:

Supplement: b102410h_7s.pdf [file b102410h_7s.pdf]

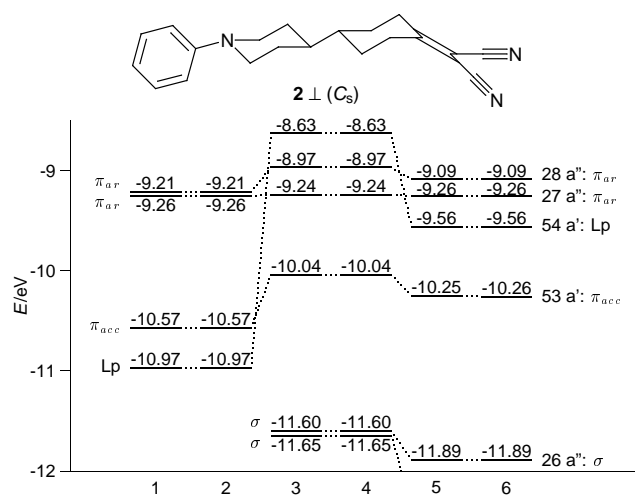

Figure 8S:

Supplement: b102410h_8s.pdf [file b102410h_8s.pdf]
